# Supplementary material for: Assessment of the Genetic Basis of Rosacea by Genome-Wide Association Study
Source: PubMed Central journal article supplement — J Invest Dermatol. 2015 Mar 12;135(6):1548–55. doi: 10.1038/jid.2015.53 (PMC4434179; doi:10.1038/jid.2015.53), 2015-03-12
Supplement: jid201553x1.pdf [file jid201553x1.pdf]

**Supplementary Figure 1.** Quantile-quantile plot of p-values from the discovery group plotted on a logarithmic scale. Gray line indicates expected p-value distribution under the null hypothesis. Blue dots indicate observed p-values. Dashed lines represent a 95% confidence envelope assuming the test results are independent.

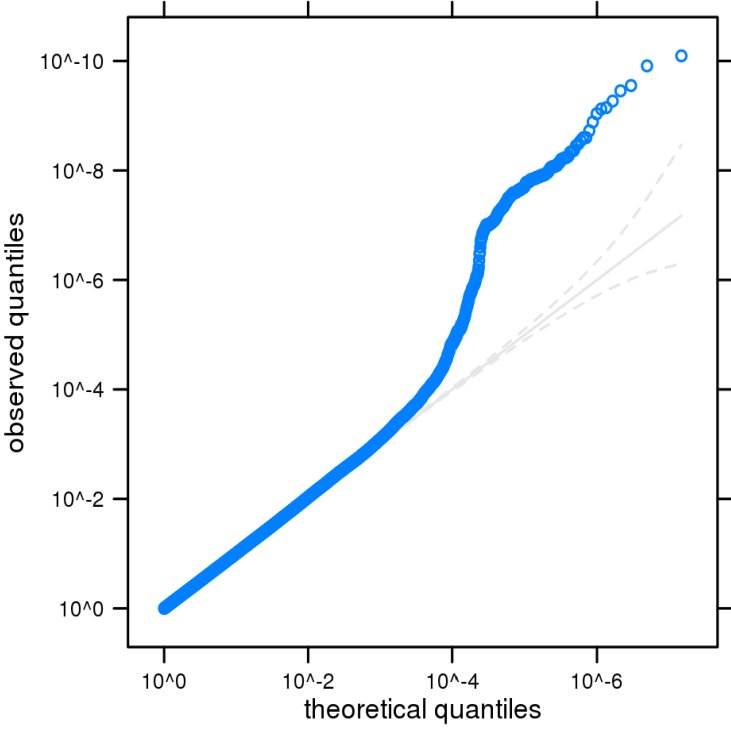

**Supplementary Table 1. Quality statistics for the discovery group GWAS.**

a) Quality statistics describing the two significant SNPs in 23andMe customers of European ancestry. Both SNPs were imputed.  $R^2$ =observed variance in imputed dosages as a fraction of the expected variance (a measure of imputation quality).

b) Average imputed dosage of the alphabetically second allele in rosacea cases and controls.

**a**

| <b>SNP</b>  | <b>Average <math>R^2</math></b> | <b>Minimum <math>R^2</math></b> | <b>Dosage of minor allele</b> |
|-------------|---------------------------------|---------------------------------|-------------------------------|
| rs763035    | 0.8806                          | 0.7749                          | 0.8613                        |
| rs111314066 | 0.6893                          | 0.6350                          | 0.0167                        |

**b**

| <b>SNP</b>  | <b><u>Controls</u><br/>Average imputed dosage of minor allele</b> | <b><u>Rosacea Cases</u><br/>Average imputed dosage of minor allele</b> |
|-------------|-------------------------------------------------------------------|------------------------------------------------------------------------|
| rs763035    | 0.8514                                                            | 0.8813                                                                 |
| rs111314066 | 0.0162                                                            | 0.0256                                                                 |
